# Supplementary material for: Factors associated with using alternative sources of primary care: a cross-sectional study
Source: PubMed Central journal article supplement (PMC6894211; doi:10.1186/s12913-019-4743-4), 2019-12-04
Supplement: 12913_2019_4743_MOESM1_ESM.pdf [file 12913_2019_4743_MOESM1_ESM.pdf]

## Access to Care Questionnaire

1. What is your age range? [CIRCLE ONE]

|       |  |       |  |     |  |
|-------|--|-------|--|-----|--|
| 18-39 |  | 40-64 |  | 65+ |  |
|-------|--|-------|--|-----|--|

2. What is your gender?

Male

Female

3. What is the highest grade or school level that you have completed?

Less than a high school degree

High school degree

More than a high school degree

4. Are you Hispanic /Latino?

No, not Hispanic/Latino

Yes, Hispanic/Latino

5. What is your race? [SELECT ONE OR MORE OF THESE CATEGORIES]

White

Black or African American

Asian

Other **Specify:** a. \_\_\_\_\_

6. What is your current home address?

Address: \_\_\_\_\_

City, State, Zip: \_\_\_\_\_

7. How long have you lived here? \_\_\_\_\_

**8. What insurance do you have? [CHECK ALL THAT APPLY]**

|                            |                                 |                                             |                                |                               |
|----------------------------|---------------------------------|---------------------------------------------|--------------------------------|-------------------------------|
| <input type="checkbox"/> 1 | Medicaid                        | → Does he/she have a primary care provider? | <input type="checkbox"/> 1 Yes | <input type="checkbox"/> 2 No |
| <input type="checkbox"/> 2 | Medicare                        | → Does he/she have a primary care provider? | <input type="checkbox"/> 1 Yes | <input type="checkbox"/> 2 No |
| <input type="checkbox"/> 3 | Private                         | → Does he/she have a primary care provider? | <input type="checkbox"/> 1 Yes | <input type="checkbox"/> 2 No |
| <input type="checkbox"/> 4 | Uninsured                       | → Does he/she have a primary care provider? | <input type="checkbox"/> 1 Yes | <input type="checkbox"/> 2 No |
| <input type="checkbox"/> 0 | Other, please specify: a. _____ |                                             |                                |                               |
|                            |                                 | → Does he/she have a primary care provider? | <input type="checkbox"/> 1 Yes | <input type="checkbox"/> 2 No |

**9. Do you have any of these health conditions? [CHECK ALL THAT APPLY]**

|                             |                  |               |                             |                                              |
|-----------------------------|------------------|---------------|-----------------------------|----------------------------------------------|
| <input type="checkbox"/> 99 | None             | → skip to #12 | <input type="checkbox"/> 8  | Hypertension/High Blood Pressure             |
| <input type="checkbox"/> 1  | Diabetes Type I  |               | <input type="checkbox"/> 9  | Heart Disease                                |
| <input type="checkbox"/> 2  | Diabetes Type II |               | <input type="checkbox"/> 10 | Cancer                                       |
| <input type="checkbox"/> 3  | Asthma           |               | <input type="checkbox"/> 11 | COPD (Chronic Obstructive Pulmonary Disease) |
| <input type="checkbox"/> 4  | Allergies        |               | <input type="checkbox"/> 12 | Arthritis                                    |
| <input type="checkbox"/> 5  | ADD/ADHD         |               | <input type="checkbox"/> 13 | Obesity                                      |
| <input type="checkbox"/> 6  | Kidney Disease   |               | <input type="checkbox"/> 14 | Anxiety/Depression                           |
| <input type="checkbox"/> 7  | Seizure Disorder |               | <input type="checkbox"/> 0  | Other _____                                  |

**10. Do you feel you have access to care for these conditions (from question 9)?**

|                            |                                 |
|----------------------------|---------------------------------|
| <input type="checkbox"/> 1 | Yes to all                      |
| <input type="checkbox"/> 2 | Yes to some → a. comment: _____ |
| <input type="checkbox"/> 3 | No → skip to #12                |
| <input type="checkbox"/> 8 | Not Applicable                  |

**11. For these conditions, do you see a specialist or your primary care doctor?**

Specialist , list conditions: \_\_\_\_\_

Primary care doctor (PCP) , list conditions: \_\_\_\_\_

Both specialist and primary care doctor , list conditions: \_\_\_\_\_

I do not see a specialist or primary care doctor, list conditions: \_\_\_\_\_

Not Applicable

**12. Now, think about your overall health care needs. Do you feel you currently have access to general primary healthcare?**

Yes

No

**13. What type of clinic do you go to for your primary care?**

Private clinic

Community clinic (for example: Daughters of Charity, St. Thomas, EXCELth, Jefferson Community Clinics, St. Charles Community Health Center)

Mobile clinic

Other \_\_\_\_\_

Don't know

None → skip to #16

**14. If there is one particular place that you go for almost all of your health care, how long have you gone there?**

Less than 1 year

1 - 3 years

4 -7 years

8 - 10 years

11 or more years

Don't Know

I don't have a regular doctor or nurse

**15. If there is one particular person that you think of as your regular doctor or nurse, how long has this person been your doctor or nurse?**

- <sub>1</sub> Less than 1 year
- <sub>2</sub> 1 - 3 years
- <sub>3</sub> 4 -7 years
- <sub>4</sub> 8 - 10 years
- <sub>5</sub> 11 or more years
- <sub>0</sub> Don't Know
- <sub>6</sub> I don't have a regular doctor or nurse

**16. Have you ever used a mobile health clinic?**

- <sub>1</sub> Yes → What Kind? a. \_\_\_\_\_
- <sub>2</sub> No

*Please answer #17, regardless of your answer to #16.*

**17. People often face barriers when trying to get health care. Do you think these would be problems going to a MOBILE HEALTH CLINIC?**

| <b>Problems with:</b>                                         | Big problem | Somewhat of a problem | Unsure | Not a big problem | Not a problem at all |
|---------------------------------------------------------------|-------------|-----------------------|--------|-------------------|----------------------|
| a. Getting to the mobile clinic                               | (0)         | (1)                   | (2)    | (3)               | (4)                  |
| b. Contacting the mobile clinic by phone                      | (0)         | (1)                   | (2)    | (3)               | (4)                  |
| c. Having to wait too many days to be seen                    | (0)         | (1)                   | (2)    | (3)               | (4)                  |
| d. Getting care after hours or on the weekends                | (0)         | (1)                   | (2)    | (3)               | (4)                  |
| e. Having to take care of household responsibilities          | (0)         | (1)                   | (2)    | (3)               | (4)                  |
| f. Having to take time off work                               | (0)         | (1)                   | (2)    | (3)               | (4)                  |
| g. Doctors or nurses not fluent in your language              | (0)         | (1)                   | (2)    | (3)               | (4)                  |
| h. Getting referrals to specialists                           | (0)         | (1)                   | (2)    | (3)               | (4)                  |
| i. Getting enough help with paperwork or forms                | (0)         | (1)                   | (2)    | (3)               | (4)                  |
| j. Mistakes made by doctors or nurses                         | (0)         | (1)                   | (2)    | (3)               | (4)                  |
| k. Worrying that doctors and nurses will not do what is right | (0)         | (1)                   | (2)    | (3)               | (4)                  |
| l. Getting a thorough examination                             | (0)         | (1)                   | (2)    | (3)               | (4)                  |

|    |                                                                                 |     |     |     |     |     |
|----|---------------------------------------------------------------------------------|-----|-----|-----|-----|-----|
| m. | Feeling like doctors are trying to give as little service as possible           | (0) | (1) | (2) | (3) | (4) |
| n. | Uncaring office staff                                                           | (0) | (1) | (2) | (3) | (4) |
| o. | Getting your questions answered                                                 | (0) | (1) | (2) | (3) | (4) |
| p. | Not knowing what to expect from one visit to the next                           | (0) | (1) | (2) | (3) | (4) |
| q. | Doctors rushing you through the visit                                           | (0) | (1) | (2) | (3) | (4) |
| r. | I am not confident the mobile clinic will be in my neighborhood long-term       | (0) | (1) | (2) | (3) | (4) |
| s. | Lack of privacy                                                                 | (0) | (1) | (2) | (3) | (4) |
| t. | I don't think the mobile clinic has everything needed to provide complete care. | (0) | (1) | (2) | (3) | (4) |

**18. Do you use a COMMUNITY CLINIC (for example: Daughters of Charity, St. Thomas, EXCELth, Jefferson Community Clinics, St. Charles Community Health Center)?**

Yes

No

*Please answer #19, regardless of your answer to #18.*

**19. People often face barriers when trying to get health care. Do you think these would be problems going to a COMMUNITY CLINIC?**

| Problems with:                                       | Big problem | Somewhat of a problem | Unsure | Not a big problem | Not a problem at all |
|------------------------------------------------------|-------------|-----------------------|--------|-------------------|----------------------|
| a. Getting to the community clinic                   | (0)         | (1)                   | (2)    | (3)               | (4)                  |
| b. Getting hold of the community clinic by phone     | (0)         | (1)                   | (2)    | (3)               | (4)                  |
| c. Having to wait too many days to be seen           | (0)         | (1)                   | (2)    | (3)               | (4)                  |
| d. Getting care after hours or on the weekends       | (0)         | (1)                   | (2)    | (3)               | (4)                  |
| e. Having to take care of household responsibilities | (0)         | (1)                   | (2)    | (3)               | (4)                  |
| f. Having to take time off work                      | (0)         | (1)                   | (2)    | (3)               | (4)                  |
| g. Doctors or nurses not fluent in your language     | (0)         | (1)                   | (2)    | (3)               | (4)                  |
| h. Getting referrals to specialists                  | (0)         | (1)                   | (2)    | (3)               | (4)                  |
| i. Getting enough help with paperwork or forms       | (0)         | (1)                   | (2)    | (3)               | (4)                  |
| j. Mistakes made by doctors or nurses                | (0)         | (1)                   | (2)    | (3)               | (4)                  |

|                                                                                       |     |     |     |     |     |
|---------------------------------------------------------------------------------------|-----|-----|-----|-----|-----|
| k. Worrying that doctors and nurses will not do what is right                         | (0) | (1) | (2) | (3) | (4) |
| l. Getting a thorough examination                                                     | (0) | (1) | (2) | (3) | (4) |
| m. Feeling like doctors are trying to give as little service as possible              | (0) | (1) | (2) | (3) | (4) |
| n. Uncaring office staff                                                              | (0) | (1) | (2) | (3) | (4) |
| o. Getting your questions answered                                                    | (0) | (1) | (2) | (3) | (4) |
| p. Not knowing what to expect from one visit to the next                              | (0) | (1) | (2) | (3) | (4) |
| q. Doctors rushing you through the visit                                              | (0) | (1) | (2) | (3) | (4) |
| r. I am not confident the community clinic will be in my neighborhood long-term       | (0) | (1) | (2) | (3) | (4) |
| s. Lack of privacy                                                                    | (0) | (1) | (2) | (3) | (4) |
| t. I don't think the community clinic has everything needed to provide complete care. | (0) | (1) | (2) | (3) | (4) |
